# Supplementary material for: Degradation of Bisphenol A by Bacillus subtilis P74 Isolated from Traditional Fermented Soybean Foods
Source: MDPI journal article supplement (doi:10.3390/microorganisms11092132), 2023-08-22
Supplement: s1 [file s1]

Supplementary Materials:

# Degradation of Bisphenol A by *Bacillus subtilis* P74 Isolated from Traditional Fermented Soybean Foods

Young Kyoung Park and Young-Wook Chin \*

Research Group of Traditional Food, Korea Food Research Institute, Iseo-myeon,  
Wanju-gun 55365, Jeollabuk-do, Republic of Korea

\* Correspondence: ywchin@kfri.re.kr; Tel.: +82-63-219-9317

Table S1. BPA-degrading ability of microorganisms isolated from Korean traditional fermented soybean products.

| Species                               | N <sup>a</sup> | BPA degradation rate (%)                 |
|---------------------------------------|----------------|------------------------------------------|
| <i>Bacillus aerius</i>                | 1              | 31.0 <sup>b</sup>                        |
| <i>Bacillus amyloliquefaciens</i>     | 13             | 22.7 ± 13.1 <sup>c</sup><br>(7.6 – 54.0) |
| <i>Bacillus atrophaeus</i>            | 8              | 49.9 ± 7.2<br>(41.8 – 64.4)              |
| <i>Bacillus coagulans</i>             | 2              | 36.9 ± 46.9<br>(3.7 – 70.1)              |
| <i>Bacillus glycinifermentans</i>     | 2              | 25.4 ± 14.5<br>(15.1 – 35.7)             |
| <i>Bacillus licheniformis</i>         | 14             | 43.7 ± 13.4<br>(6.2 – 54.5)              |
| <i>Bacillus paralicheniformis</i>     | 3              | 14.3 ± 15.2<br>(-3.3 – 23.9)             |
| <i>Bacillus safensis</i>              | 1              | 24.7                                     |
| <i>Bacillus siamensis</i>             | 2              | 30.4 ± 4.9<br>(26.9 – 33.9)              |
| <i>Bacillus sonorensis</i>            | 6              | 64.8 ± 4.8<br>(58.8 – 70.9)              |
| <i>Bacillus spp.</i>                  | 23             | 33.2 ± 12.2<br>(10.4 – 58.0)             |
| <i>Bacillus sporothermodurans</i>     | 1              | 41.8                                     |
| <i>Bacillus subtilis</i>              | 48             | 43.6 ± 18.3<br>(14.2 – 92.1)             |
| <i>Bacillus thermoamylovorans</i>     | 2              | 29.1 ± 41.0<br>(0.0 – 58.1)              |
| <i>Bacillus vallismortis</i>          | 1              | 27.9                                     |
| <i>Bacillus velezensis</i>            | 1              | 19.9                                     |
| <i>Brevibacterium frigoritolerans</i> | 1              | 12.0                                     |

<sup>a</sup> The number of strains tested.

<sup>b</sup> The value obtained from a single strain.

<sup>c</sup> Mean ± standard deviation (the range from minimum to maximum).

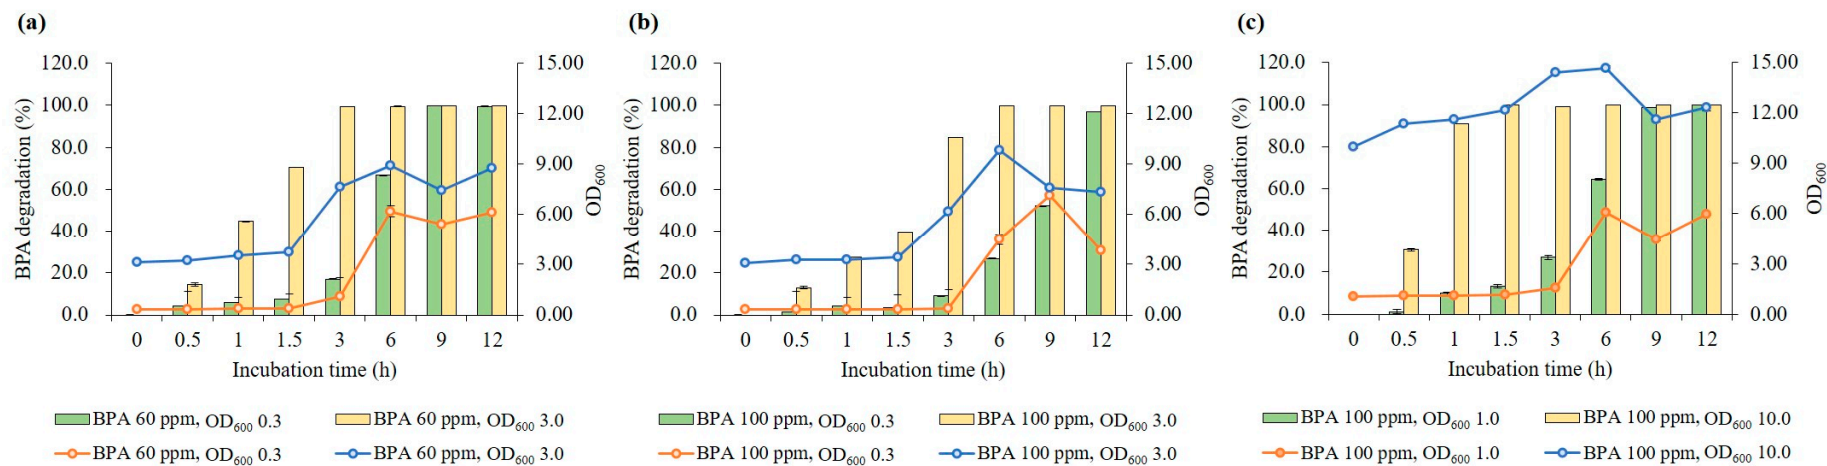

Figure S1. Performance of BPA degradation by *B. subtilis* P74 in the flask culture containing (a) 60 mg/L and (b, c) 100 mg/L BPA at incubation temperatures of 40°C. The data represent mean  $\pm$  standard deviation from three measurements of harvested samples.

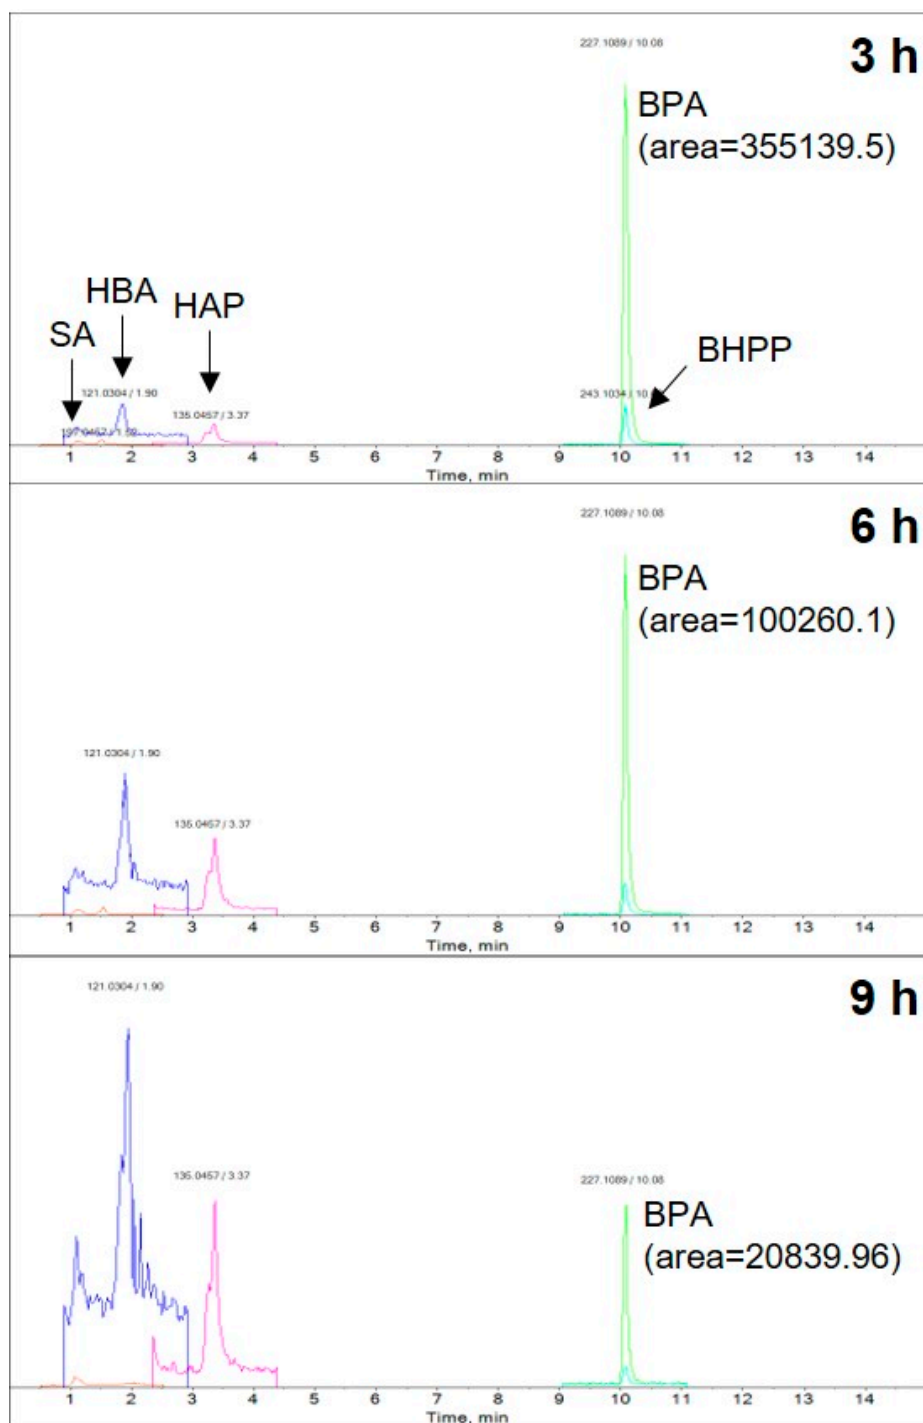

Figure S2. Ion chromatogram of the BPA degradation by *B. subtilis* P74 during the fermentation. Candidate metabolites were detected; 4-hydroxybenzaldehyde (HBA), 4-hydroxyacetophenone (HAP), syringic acid (SA), and 1,2-bis(4-hydroxyphenyl)-2-propanol (BHPP)

| m/z<br>RT         | Formula<br>Finder results                      | Candidate metabolites                                                                                                                    | MS spectrum                                                                          |
|-------------------|------------------------------------------------|------------------------------------------------------------------------------------------------------------------------------------------|--------------------------------------------------------------------------------------|
| 121.0304<br>1.90  | C <sub>7</sub> H <sub>6</sub> O <sub>2</sub>   | 4-Hydroxybenzaldehyde<br>(HBA)<br>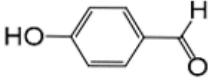                      |    |
| 135.0457<br>3.37  | C <sub>8</sub> H <sub>8</sub> O <sub>2</sub>   | 4-Hydroxyacetophenone<br>(HAP)<br>                      |    |
| 197.0457<br>1.52  | C <sub>9</sub> H <sub>10</sub> O <sub>5</sub>  | Syringic acid<br>(SA)<br>                               |    |
| 227.1089<br>10.08 | C <sub>15</sub> H <sub>16</sub> O <sub>2</sub> | Bisphenol A<br>(BPA)<br>                              |   |
| 243.1034<br>10.08 | C <sub>15</sub> H <sub>16</sub> O <sub>3</sub> | 1,2-Bis(4-hydroxyphenyl)-<br>2-propanol<br>(BHPP)<br> |  |

Figure S3. MS/MS spectrum and structure of the candidate metabolites found during BPA degradation by *B. subtilis* P74.
